# Supplementary material
Source: ML conference proceedings conference paper supplement (https://openaccess.thecvf.com/content/ACCV2022/html/Li_Neural_Plenoptic_Sampling_ACCV_2022_paper.html)
Supplement: Supplementary file 3 [file Li_Neural_Plenoptic_Sampling_ACCV_2022_supplemental.zip]

Archive with 4 entries (4 files):
- 0092-supp.pdf
- __MACOSX/._0092-supp.pdf
- 0092-supp.mp4
- __MACOSX/._0092-supp.mp4
